# Supplementary figures and images for: Rate-dependence of ‘wet’ biological adhesives and the function of the pad secretion in insects
Source: Royal Society of Chemistry journal article supplement (doi:10.1039/c5sm01496d), 2015-01-01

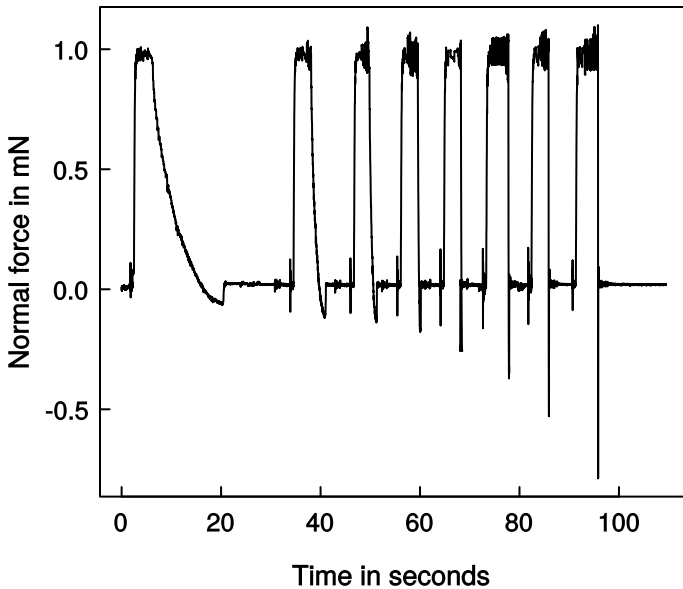

Supplement: c5sm01496d2.pdf [file c5sm01496d2.pdf]
